# Supplementary material for: Small Cajal Body-Specific RNA12 Promotes Carcinogenesis through Modulating Extracellular Matrix Signaling in Bladder Cancer
Source: MDPI journal article supplement (doi:10.3390/cancers16030483), 2024-01-23
Supplement: s1 [file s1]

# Supplementary Materials: Small Cajal Body-Specific RNA12 Promotes Carcinogenesis through Modulating Extracellular Matrix Signaling in Bladder Cancer

Qinchen Lu, Jiandong Wang, Yuting Tao, Jialing Zhong, Zhao Zhang, Chao Feng, Xi Wang, Tianyu Li, Rongquan He, Qiuyan Wang and Yuanliang Xie

Table S1. The clinical characteristics of 52 BLCA patients.

| Characteristics      | Number of patients |
|----------------------|--------------------|
| Gender               |                    |
| Male                 | 44                 |
| Female               | 8                  |
| Age                  |                    |
| <55                  | 11                 |
| ≥55                  | 39                 |
| TNM stage            |                    |
| I, II                | 34                 |
| III,IV               | 16                 |
| Smoking              |                    |
| Yes                  | 24                 |
| No                   | 26                 |
| Grade                |                    |
| High                 | 41                 |
| Low                  | 7                  |
| Lymphatic metastasis |                    |
| Yes                  | 13                 |
| No                   | 29                 |

Table S2. ISH scores of SCARNA12 in clinical tissue samples.

| Tissue type      | Cases | SCARNA12 expression level |            | P value |
|------------------|-------|---------------------------|------------|---------|
|                  |       | High level                | Low level  |         |
| Tumour tissues   | 140   | 118 (84.3%)               | 22 (15.7%) | <0.001  |
| Adjacent tissues | 51    | 11 (21.6%)                | 40 (78.4%) |         |

Table S3. The panel of antibodies used for CyTOF.

| Antibodies           | Clone    | Source   | Product_ID | Label |
|----------------------|----------|----------|------------|-------|
| ALDH                 | 44       | Fluidigm | 3147015B   | 147Sm |
| Androgen Receptor    | G122-434 | Fluidigm | 3154018B   | 154Sm |
| c-Myc                | 9E10     | Fluidigm | 3176012B   | 176Yb |
| CK6                  | EPR4515  | Abcam    | ab222395   | 146Nd |
| CK5                  | CK5      | Abcam    | ab53121    | 164Dy |
| Estrogen Receptor -α | C-542    | Abcam    | ab66102    | 142Nd |

|                            |         |           |          |       |
|----------------------------|---------|-----------|----------|-------|
| Estrogen Receptor- $\beta$ | 14C8    | Abcam     | ab288    | 174Yb |
| Ki67                       | Ki67    | BioLegend | 350523   | 161Dy |
| KLF4                       | D1F2    | Fluidigm  | 3162022A | 162Dy |
| LGR5                       | SA222C5 | BioLegend | 373802   | 155Gd |
| MET                        | D1C2    | Fluidigm  | 3167017A | 167Er |
| MUC1                       | SM3     | Abcam     | ab22711  | 168Er |
| Nanog                      | N31-355 | Fluidigm  | 3169014A | 169Tm |
| Notch2                     | MHN2-25 | Fluidigm  | 3165026B | 165Ho |
| OV6                        | OV-6    | R&D       | MAB2020  | 152Sm |
| p21                        | 12D1    | Fluidigm  | 3159026A | 159Tb |
| p53                        | 7F5     | Fluidigm  | 3143018A | 143Nd |
| Sox2                       | O30-678 | Fluidigm  | 3150019B | 150Nd |
| Vimentin                   | RV202   | Fluidigm  | 3156023A | 156Gd |
| CD45                       | HI30    | BioLegend | 304045   | Y89   |
| CD13                       | WM15    | Fluidigm  | 3160014B | 160Gd |
| CD24                       | ML5     | Fluidigm  | 3166007B | 166Er |
| CD34                       | 581     | Fluidigm  | 3149013B | 149Sm |
| CD44                       | IM7     | Fluidigm  | 3171003B | 171Yb |
| CD47                       | CC2C6   | Fluidigm  | 3209004B | 209Bi |
| CD54                       | HA58    | Fluidigm  | 3170014B | 170Er |
| CD90                       | 5E10    | BioLegend | 328102   | 158Gd |
| CD104                      | 58XB4   | Fluidigm  | 3173008B | 173Yb |
| CD133                      | 170411  | R&D       | MAB11331 | 153Eu |
| CD166                      | 3A6     | BioLegend | 343902   | 145Nd |
| CD274 (PD-L1)              | 29E.2A3 | Fluidigm  | 3175017B | 175Lu |
| CD326 (EpCAM)              | 9C4     | Fluidigm  | 3141006B | 141Pr |
| CD333 (FGFR3)              | 136334  | R&D       | MAB766   | 151Eu |

---

**Table S4.** Detection of SCARNA12 interacting protein using Chromatin Isolation by RNA Purification (ChIRP) .

| Accession  | Score | Mass   | Matches   | Sequences | emPAI | Protein description                                                                   |
|------------|-------|--------|-----------|-----------|-------|---------------------------------------------------------------------------------------|
| P02760     | 10909 | 39886  | 257 (218) | 2 (2)     | 0.49  | Protein AMBP OS=Homo sapiens OX=9606 GN=AMBP PE=1 SV=1                                |
| P41222     | 4167  | 21243  | 151 (119) | 3 (3)     | 0.8   | Prostaglandin-H2 D-isomerase OS=Homo sapiens OX=9606 GN=PTGDS PE=1 SV=1               |
| P04264     | 710   | 66170  | 29 (22)   | 23 (19)   | 1.77  | Keratin, type II cytoskeletal 1 OS=Homo sapiens OX=9606 GN=KRT1 PE=1 SV=6             |
| P35908     | 337   | 65678  | 16 (10)   | 15 (10)   | 0.63  | Keratin, type II cytoskeletal 2 epidermal OS=Homo sapiens OX=9606 GN=KRT2 PE=1 SV=2   |
| P13647     | 145   | 62568  | 7 (5)     | 7 (5)     | 0.29  | Keratin, type II cytoskeletal 5 OS=Homo sapiens OX=9606 GN=KRT5 PE=1 SV=3             |
| P05787     | 144   | 53671  | 3 (3)     | 2 (2)     | 0.13  | Keratin, type II cytoskeletal 8 OS=Homo sapiens OX=9606 GN=KRT8 PE=1 SV=7             |
| P02538     | 96    | 60293  | 5 (3)     | 5 (3)     | 0.17  | Keratin, type II cytoskeletal 6A OS=Homo sapiens OX=9606 GN=KRT6A PE=1 SV=3           |
| P13645     | 673   | 59020  | 26 (24)   | 22 (21)   | 2.48  | Keratin, type I cytoskeletal 10 OS=Homo sapiens OX=9606 GN=KRT10 PE=1 SV=6            |
| P35527     | 251   | 62255  | 17 (11)   | 14 (10)   | 0.76  | Keratin, type I cytoskeletal 9 OS=Homo sapiens OX=9606 GN=KRT9 PE=1 SV=3              |
| P08779     | 155   | 51578  | 6 (6)     | 6 (6)     | 0.45  | Keratin, type I cytoskeletal 16 OS=Homo sapiens OX=9606 GN=KRT16 PE=1 SV=4            |
| P05783     | 61    | 48029  | 3 (2)     | 3 (2)     | 0.14  | Keratin, type I cytoskeletal 18 OS=Homo sapiens OX=9606 GN=KRT18 PE=1 SV=2            |
| P02753     | 638   | 23337  | 35 (23)   | 1 (1)     | 0.14  | Retinol-binding protein 4 OS=Homo sapiens OX=9606 GN=RBP4 PE=1 SV=3                   |
| P02768     | 186   | 71317  | 12 (6)    | 8 (3)     | 0.2   | Serum albumin OS=Homo sapiens OX=9606 GN=ALB PE=1 SV=2                                |
| P35579     | 160   | 227646 | 11 (4)    | 11 (4)    | 0.06  | Myosin-9 OS=Homo sapiens OX=9606 GN=MYH9 PE=1 SV=4                                    |
| P01834     | 154   | 11929  | 5 (3)     | 2 (2)     | 1.14  | Immunoglobulin kappa constant OS=Homo sapiens OX=9606 GN=IGKC PE=1 SV=2               |
| P60709     | 126   | 42052  | 12 (7)    | 9 (6)     | 0.7   | Actin, cytoplasmic 1 OS=Homo sapiens OX=9606 GN=ACTB PE=1 SV=1                        |
| A0A0C4DH25 | 122   | 12621  | 1 (1)     | 1 (1)     | 0.27  | Immunoglobulin kappa variable 3D-20 OS=Homo sapiens OX=9606 GN=IGKV3D-20 PE=3 SV=1    |
| P02671     | 87    | 95656  | 1 (1)     | 1 (1)     | 0.03  | Fibrinogen alpha chain OS=Homo sapiens OX=9606 GN=FGA PE=1 SV=2                       |
| Q8WVN6     | 82    | 27307  | 1 (1)     | 1 (1)     | 0.12  | Secreted and transmembrane protein 1 OS=Homo sapiens OX=9606 GN=SECTM1 PE=1 SV=2      |
| P0C0L4     | 74    | 194261 | 1 (1)     | 1 (1)     | 0.02  | Complement C4-A OS=Homo sapiens OX=9606 GN=C4A PE=1 SV=2                              |
| P68871     | 70    | 16102  | 2 (2)     | 2 (2)     | 0.47  | Hemoglobin subunit beta OS=Homo sapiens OX=9606 GN=HBB PE=1 SV=2                      |
| P62805     | 69    | 11360  | 3 (3)     | 2 (2)     | 1.22  | Histone H4 OS=Homo sapiens OX=9606 GN=HIST1H4A PE=1 SV=2                              |
| Q9BQE3     | 65    | 50548  | 1 (1)     | 1 (1)     | 0.07  | Tubulin alpha-1C chain OS=Homo sapiens OX=9606 GN=TUBA1C PE=1 SV=1                    |
| O00187     | 62    | 77193  | 1 (1)     | 1 (1)     | 0.04  | Mannan-binding lectin serine protease 2 OS=Homo sapiens OX=9606 GN=MASP2 PE=1 SV=4    |
| O43390     | 46    | 71184  | 1 (1)     | 1 (1)     | 0.05  | Heterogeneous nuclear ribonucleoprotein R OS=Homo sapiens OX=9606 GN=HNRNPR PE=1 SV=1 |
| P69905     | 41    | 15305  | 1 (1)     | 1 (1)     | 0.22  | Hemoglobin subunit alpha OS=Homo sapiens OX=9606 GN=HBA1 PE=1 SV=2                    |
| P0C0S5     | 40    | 13545  | 1 (1)     | 1 (1)     | 0.25  | Histone H2A.Z OS=Homo sapiens OX=9606 GN=H2AFZ PE=1 SV=2                              |
| P19338     | 38    | 76625  | 2 (1)     | 2 (1)     | 0.04  | Nucleolin OS=Homo sapiens OX=9606 GN=NCL PE=1 SV=3                                    |
| Q8TF72     | 37    | 218321 | 1 (1)     | 1 (1)     | 0.01  | Protein Shroom3 OS=Homo sapiens OX=9606 GN=SHROOM3 PE=1 SV=2                          |
| P16402     | 37    | 22336  | 15 (2)    | 3 (2)     | 0.32  | Histone H1.3 OS=Homo sapiens OX=9606 GN=HIST1H1D PE=1 SV=2                            |
| P07911     | 36    | 72451  | 1 (1)     | 1 (1)     | 0.05  | Uromodulin OS=Homo sapiens OX=9606 GN=UMOD PE=1 SV=1                                  |
| P20929     | 31    | 775393 | 5 (1)     | 5 (1)     |       | Nebulin OS=Homo sapiens OX=9606 GN=NEB PE=1 SV=5                                      |
| O15018     | 30    | 303964 | 3 (1)     | 3 (1)     | 0.01  | PDZ domain-containing protein 2 OS=Homo sapiens OX=9606 GN=PDZD2 PE=1 SV=4            |
| Q6NXT2     | 28    | 15318  | 3 (1)     | 3 (1)     | 0.22  | Histone H3.3C OS=Homo sapiens OX=9606 GN=H3F3C PE=1 SV=3                              |
| Q86Y46     | 27    | 59457  | 2 (1)     | 2 (1)     | 0.06  | Keratin, type II cytoskeletal 73 OS=Homo sapiens OX=9606 GN=KRT73 PE=1 SV=1           |

|        |    |         |        |        |      |                                                                                                     |
|--------|----|---------|--------|--------|------|-----------------------------------------------------------------------------------------------------|
| P62979 | 27 | 18296   | 3 (1)  | 3 (1)  | 0.18 | Ubiquitin-40S ribosomal protein S27a OS=Homo sapiens OX=9606 GN=RPS27A PE=1 SV=2                    |
| Q14BN4 | 25 | 95995   | 1 (1)  | 1 (1)  | 0.03 | Sarcolemmal membrane-associated protein OS=Homo sapiens OX=9606 GN=SLMAP PE=1 SV=1                  |
| Q5VTE0 | 25 | 50495   | 1 (1)  | 1 (1)  | 0.07 | Putative elongation factor 1-alpha-like 3 OS=Homo sapiens OX=9606 GN=EEF1A1P5 PE=5 SV=1             |
| Q8N448 | 23 | 77154   | 5 (1)  | 1 (1)  | 0.04 | Ligand of Numb protein X 2 OS=Homo sapiens OX=9606 GN=LNK2 PE=1 SV=1                                |
| Q8IX30 | 22 | 114399  | 2 (1)  | 2 (1)  | 0.03 | Signal peptide, CUB and EGF-like domain-containing protein 3 OS=Homo sapiens OX=9606 GN=SCUBE3 PE=1 |
| Q8N3F8 | 21 | 94352   | 1 (1)  | 1 (1)  | 0.03 | MICAL-like protein 1 OS=Homo sapiens OX=9606 GN=MICAL1 PE=1 SV=2                                    |
| Q8WZ42 | 19 | 3842904 | 14 (1) | 13 (1) |      | Titin OS=Homo sapiens OX=9606 GN=TTN PE=1 SV=4                                                      |
| P98088 | 18 | 601963  | 2 (1)  | 2 (1)  | 0.01 | Mucin-5AC OS=Homo sapiens OX=9606 GN=MUC5AC PE=1 SV=4                                               |
| P04198 | 16 | 49930   | 3 (1)  | 1 (1)  | 0.07 | N-myc proto-oncogene protein OS=Homo sapiens OX=9606 GN=MYCN PE=1 SV=2                              |
